# Supplementary material
Source: PubMed Central journal article supplement (PMC8092903)
Supplement: AAC.02180-20-s0001.pdf [file AAC.02180-20-s0001.pdf]

## **Supplementary data for the article**

### **Targeting Superoxide dismutase confers enhanced Reactive Oxygen Species mediated eradication of Polymyxin B induced *Acinetobacter baumannii* persisters**

Vineet Dubey,<sup>a</sup> Rinki Gupta,<sup>a</sup> Ranjana Pathania<sup>a\*</sup>

<sup>a</sup> Department of Biotechnology, Indian Institute of Technology, Roorkee-247667, India

\* Correspondences should be addressed to: (e-mail: ranjana.pathania@bt.iitr.ac.in)

**Number of figures:** 7

**Number of tables:** 2

#### **Table of Content**

**Table S1:** MICs (in µg/ml) of different antibiotics against clinical isolates of *A. baumannii*.

**Figure S1:** Survival rate percent of *A. baumannii* AB5075, RPTC-1 and RPCT-13 against meropenem, rifampicin and tigecycline.

**Figure S2:** (A). EtBr accumulation assay of wild type *A. baumannii* AB5075 verse polymyxin B induced persister. (B). qRT-PCR analysis RND efflux genes expression in WT verse polymyxin B persister.

**Figure S3:** Schematic representation of dual fluorescent module and verification of knock-in strain.

**Figure S4:** Tolerance assay to assess the log fold reduction in CFU/ml of polymyxin B and rifampicin treatment in different clinical strains.

**Table S2:** List of primers used in this study.

**Figure S5:** Treatment of tigecycline leads to lower production of ROS as compared to rifampicin treatment in Polymyxin B induced *A. baumannii* persister.

**Figure S6:** Polymyxin B treatment does not eradicate rifampicin persisters of *A. baumannii*.

**Figure S7:** Fluorescence microscopy to assess DNA damage in cells treated with different antibiotics both alone and in combination. Scale bar for all images are 100 µm.

**Table S1:** MICs (in  $\mu\text{g/ml}$ ) of different antibiotics against clinical isolates of *A. baumannii*.

| Strains | MIC ( $\mu\text{g/ml}$ ) |             |            |          |
|---------|--------------------------|-------------|------------|----------|
|         | Meropenem                | Tigecycline | Rifampicin | Amikacin |
| RPTC1   | 32                       | 0.25        | 1          | 256      |
| RPTC2   | 64                       | 0.25        | 16         | 512      |
| RPTC3   | 32                       | 0.25        | 1          | 512      |
| RPTC5   | 32                       | 0.25        | 16         | 512      |
| RPTC6   | 32                       | 0.25        | 0.5        | 512      |
| RPTC7   | 32                       | 0.25        | 0.5        | 512      |
| RPTC9   | 64                       | 0.25        | 2          | 512      |
| RPTC10  | 64                       | 0.5         | 2          | 128      |
| RPTC11  | 32                       | 0.25        | 2          | 32       |
| RPTC12  | 128                      | 0.25        | 16         | 512      |
| RPTC14  | 32                       | 0.5         | 1          | 256      |
| RPTC15  | 8                        | 0.125       | 0.25       | 256      |
| RPTC16  | 8                        | 0.25        | 0.5        | 256      |
| RPTC17  | 16                       | 0.5         | 0.5        | 128      |
| RPTC19  | 32                       | 0.25        | 0.5        | 64       |
| RPTC20  | 32                       | 0.25        | 0.5        | 64       |
| RPTC21  | 64                       | 0.25        | 16         | 512      |
| RPTC22  | 32                       | 0.5         | 2          | 32       |
| RPTC23  | 128                      | 0.5         | 2          | 512      |
| RPTC24  | 128                      | 0.5         | 16         | 512      |
| AB5075  | 4                        | 0.5         | 1          | 256      |

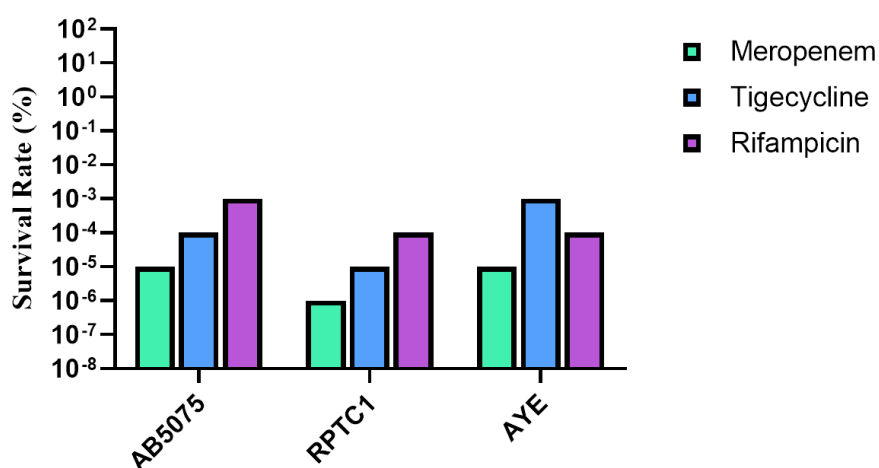

**Figure S1:** Survival rate percent of *A. baumannii* AB5075, RPTC-1 and AYE against meropenem, tigecycline and rifampicin.

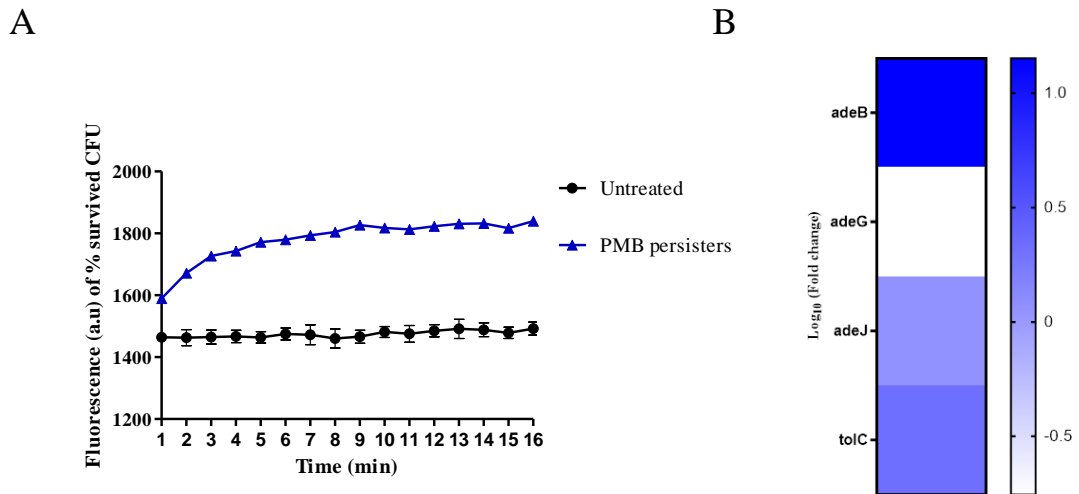

**Figure S2:** (A). EtBr accumulation assay of wild type *A. baumannii* AB5075 verses polymyxin B induced persister. (B). qRT-PCR analysis RND efflux genes expression in WT verses polymyxin B persister.

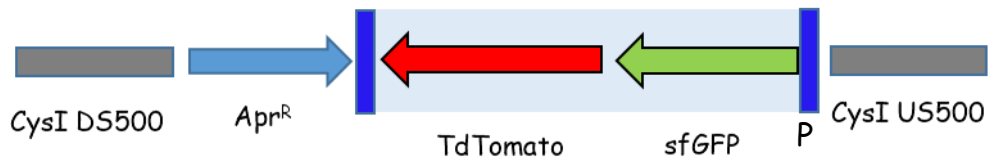

**Figure S3:** Schematic representation of dual fluorescent module and verification of knock-in strain. P indicates strong constitutive promoter.

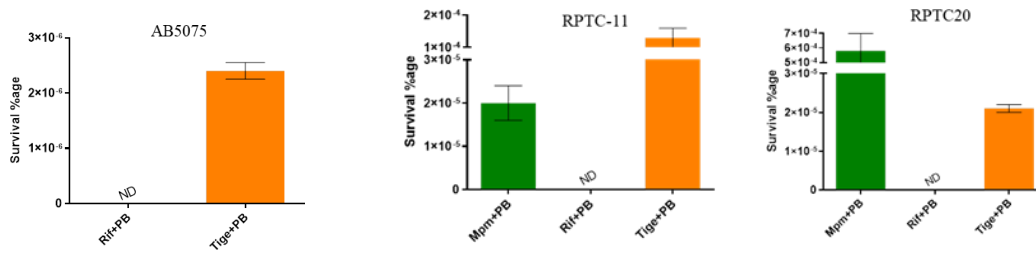

**Figure S4:** Tolerance assay to assess the log fold reduction in CFU/ml of polymyxin B and rifampicin treatment in different clinical strains.

| <b>Table S2. Primers used in this study</b> |                  |                                                                           |
|---------------------------------------------|------------------|---------------------------------------------------------------------------|
| <b>Gene</b>                                 | <b>Direction</b> | <b>Sequence 5' → 3'</b>                                                   |
| FPUSCysI500SalI                             | Forward          | AAAGTCGACGAAAAACGTATTGGTACAA                                              |
| RPUSCysI500BamHI                            | Reverse          | AAAGGATCCACATGGCGTATGGCTAGTA                                              |
| FPDSCysI500KpnI                             | Forward          | AAAGGTACCATACAGCTCTACCTGTGCTT                                             |
| RPDSCysI500EcoRI                            | Reverse          | AAAGAATTCAGCCTTTTCACTTAGAAGCTA                                            |
| Up150CysIFP                                 | Forward          | AAGCCCGGATTTATCTGGGCTTTTTTTATG                                            |
| Ds150CysIRP                                 | Reverse          | TACAAAGCTTTTTTACCTTGAATGTTAGCC                                            |
| Fpsfbamh1                                   | Forward          | AAAGGATCCAATTGACGGCTAGCTCAGTCCTAGGTACAGTGCTAGCACCCGTTTTTTTGGGCTAGAAATAATT |
| Rpsfxma1                                    | Reverse          | AAACCCGGGTTACTTGTACAGCTCGTCCATGCCCGTG                                     |
| Fptdtxma1                                   | Forward          | AAACCCGGGACCCGTTTTTTTTGGGCTAGAAATA                                        |
| Fptdtkrnp1                                  | Reverse          | AAAGGTACCATTTGTCCTACTCAGGAGAGC                                            |
| FaraCpBADRBS                                | Forward          | AAAGGATCCGTTACCAATTATGACAACCTTGACGGCT                                     |
| RaraCpBADRBS                                | Reverse          | AAACCCGGGTGTATATCTCCTTCTTAAAGTTAAAC                                       |
| fpSodBComp                                  | Forward          | AAACCCGGGTGAGCTTATTTCTCTACACCAGCTGG                                       |
| rpSodBComp                                  | Reverse          | GGGGGTACCAGGAACCTGATTTCCAAAAAAT                                           |
| 16S                                         | Forward          | TGTGAAATCCCCGAGCTTAAC                                                     |
| 16S                                         | Reverse          | TATTAGGCCAGATGGCTGC                                                       |
| sodB                                        | Forward          | GTTGTTGCAGCAGCAGTAAAT                                                     |
| sodB                                        | Reverse          | GGAACAGCATGAAGCCAAAC                                                      |
| sodC                                        | Forward          | CGTACCATGATGTGGGGCTT                                                      |
| sodC                                        | Reverse          | GGGCTTAATCATTACCCCTGCT                                                    |
| katE                                        | Forward          | TCCTTCATCCGCCACTAAAC                                                      |
| katE                                        | Reverse          | GGTAGCTCGCCATTACTTACTC                                                    |
| katG                                        | Forward          | GCTCTAATCCGCTCGGTAAAG                                                     |
| katG                                        | Reverse          | CCAGTCTTGGGAATCGGTTAAT                                                    |
| dnaK                                        | Forward          | GATGCTGGTCTTTCGACTTCT                                                     |
| dnaK                                        | Reverse          | CGTCTTTACGTGGTTCTCTACC                                                    |
| recA                                        | Forward          | CCTAGTTGGTTAGTACCTTTACCGT                                                 |
| recA                                        | Reverse          | TCTACGCTTCAGTTCGTTTAGA                                                    |
| groEL                                       | Forward          | CCAACCGAACAGGCTTATGT                                                      |
| groEL                                       | Reverse          | AGCACCTTGCCGTAGAAGAA                                                      |
| aceA                                        | Forward          | TACCGCCACGGATTTCTTTAC                                                     |
| aceA                                        | Reverse          | CACACTGCTGCTCTTTCTACTC                                                    |
| adeB                                        | Forward          | CCGCATCACCTTGAACATAAAC                                                    |
| adeB                                        | Reverse          | GGTGCTATGGGCGTTAGTATT                                                     |
| adeJ                                        | Forward          | TCCATTGCTTTCATGGCATCACCAGA                                                |
| adeJ                                        | Reverse          | AGCCGTATGATGCCTGAAGACTTA                                                  |
| adeG                                        | Forward          | CCGGTCGTTTAGAAGCAATG                                                      |
| adeG                                        | Reverse          | TGCGGTATATGTTACCTGTGC                                                     |
| tolC                                        | Forward          | CTCGCTACTGCATCTATCTGTG                                                    |
| tolC                                        | Reverse          | GCTCGATGAGTGGTTAGGATTAG                                                   |
| umuC                                        | Forward          | CTTTATATAAAACATCAATTTGCTGCA                                               |
| umuC                                        | Reverse          | TCACCTTAACCGGGCACAT                                                       |
| umuD                                        | Forward          | CAGTCAAATCATTATCGATAAGTGC                                                 |
| umuD                                        | Reverse          | GCAAGCACTCGATTTAAATGAA                                                    |

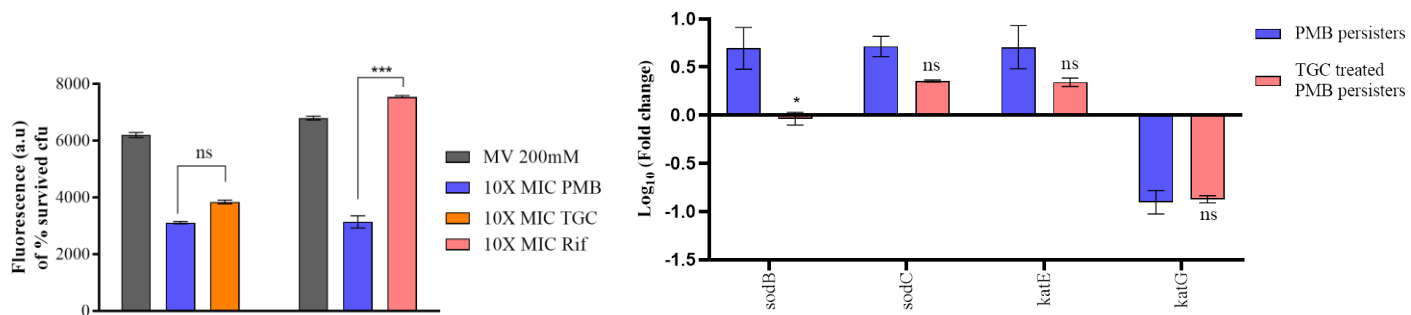

**Figure S5:** Treatment of tigecycline leads to lower production of ROS as compared to rifampicin treatment in Polymyxin B induced *A. baumannii* persister.

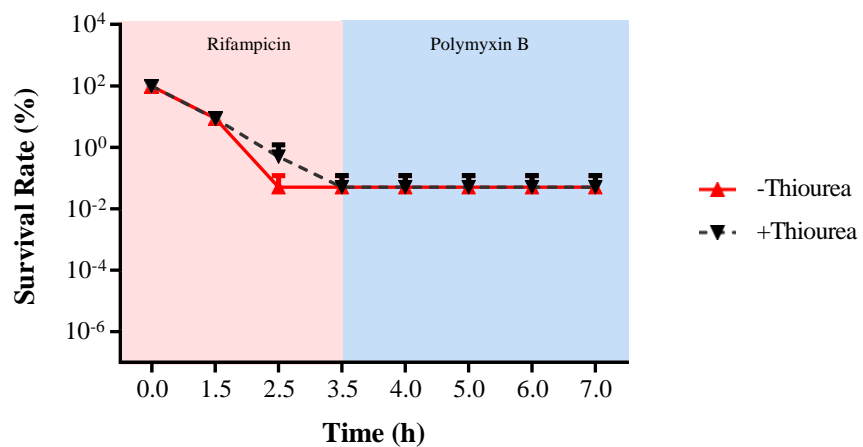

**Figure S6:** Polymyxin B treatment does not eradicate rifampicin persister of *A. baumannii*.

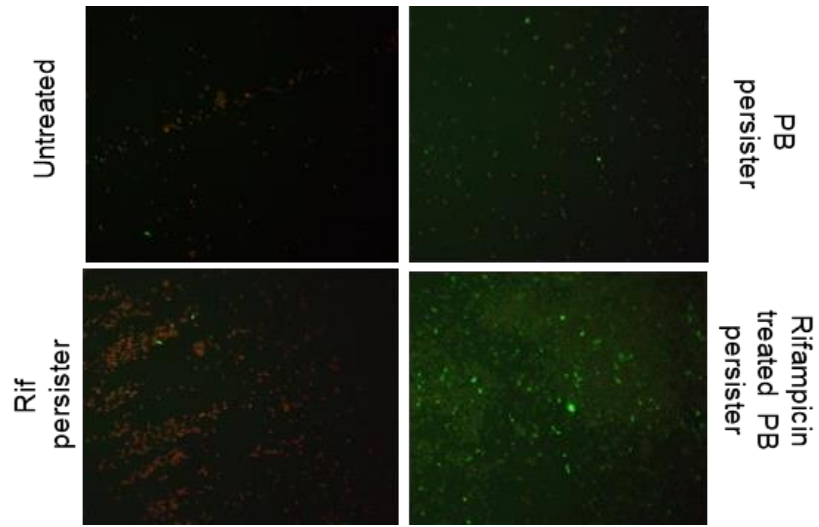

**Figure S7:** Fluorescence microscopy to assess DNA damage in cells treated with different antibiotics both alone and in combination. Scale bar for all images are 100  $\mu$ m
